# Supplementary material for: Homozygous variant in translocase of outer mitochondrial membrane 7 leads to metabolic reprogramming and microcephalic osteodysplastic dwarfism with moyamoya disease
Source: PubMed Central journal article supplement — eBioMedicine. 2024 Nov 29;110:105476. doi: 10.1016/j.ebiom.2024.105476 (PMC11648121; doi:10.1016/j.ebiom.2024.105476), 2024-11-29
Supplement: mmc1.pdf [file mmc1.pdf]

**Table S1. Key resource table**

| <b>Antibodies</b>                                           | <b>source</b>      | <b>catalog</b>       | <b>dilution</b> |
|-------------------------------------------------------------|--------------------|----------------------|-----------------|
| <i>Western blotting</i>                                     |                    |                      |                 |
| actin-HRP                                                   | Santa Cruz         | Cat.#sc-1616         | 1:20,000        |
| Alpha Tubulin Monoclonal antibody                           | ProteinTech        | Cat.#66031-1-Ig      | 1:20,000        |
| ATP5A [15H4C4]                                              | abcam              | Cat.#ab14748         | 1:20,000        |
| ATP5H Polyclonal antibody                                   | ProteinTech        | Cat.#17589-1-AP      | 1:2,000         |
| c-Myc Monoclonal Antibody (9E10)                            | Invitrogen         | Cat.#13-2500         | 1:250           |
| GAPDH-HRP                                                   | Santa Cruz         | Cat.#sc-47724        | 1:20,000        |
| PCK2 Polyclonal antibody                                    | ProteinTech        | Cat.#14892-1-AP      | 1:2,000         |
| PINK1(D8G3) Rabbit mAb                                      | Cell Signaling     | Cat.#6946            | 1:1,000         |
| TOMM7 Polyclonal Antibody                                   | Invitrogen         | Cat.#PA5-110508      | 1:250           |
| TOM22                                                       | Invitrogen         | Cat.#PA5-51804       | 1:1,000         |
| TOMM40                                                      | ProteinTech        | Cat.#8409-1-AP       | 1:20,000        |
| VDAC1/Porin                                                 | abcam              | Cat.#ab15895         | 1:1,000         |
| <i>Immunofluorescence</i>                                   |                    |                      |                 |
| Calnexin Polyclonal antibody                                | ProteinTech        | Cat.#10427-2-AP      | 1:400           |
| c-Myc Monoclonal Antibody (9E10)                            | Invitrogen         | Cat.#MA1-980         | 1:200           |
| TOMM40                                                      | ProteinTech        | Cat.#18409-1-AP      | 1:500           |
| <i>Chemicals and Reagents</i>                               |                    |                      |                 |
| <b>SOURCE</b>                                               | <b>IDENTIFIER</b>  |                      |                 |
| 3-amino benzoic acid ethyl ester (triacaine)                | Sigma              | Cat.#886-86-2        |                 |
| N-Phenylthiourea (PTU)                                      | Alfa Aesar         | Cat.#103-85-5        |                 |
| Activin A                                                   | ProSpec            | Cat.#cyt-414         |                 |
| Antimycin A from Streptomyces sp.                           | Sigma              | Cat.#1397-94-0       |                 |
| Alcian blue 8 GX                                            | Sigma              | Cat.#33864-99-2      |                 |
| acetone                                                     | Sigma              | Cat.#67-64-1         |                 |
| acetonitrile (ACN)                                          | Sigma              | Cat.#75-05-8         |                 |
| ammonium bicarbonate (ABC)                                  | Sigma              | Cat.#1066-33-7       |                 |
| BAMBANKER                                                   | Nippon Genetics    | Cat.#BB01            |                 |
| Bovine Plasma Fibronectin                                   | ScienCell          | Cat.#8248            |                 |
| Blasticidin S HCl                                           | Gibco              | Cat.#A1113903        |                 |
| basement membrane matrix phenol red free                    | Corning            | Cat.#356237          |                 |
| Cell-Tak                                                    | BD Biosciences     | Cat.#354240          |                 |
| CHIR99021                                                   | Biovision          | Cat.#1677            |                 |
| carbonyl cyanide 4-(trifluoromethoxy)phenylhydrazone (FCCP) | Sigma              | Cat.#370-86-5        |                 |
| carbonyl cyanide 3-chlorophenylhydrazone (CCCP)             | Sigma              | Cat.#555-60-2        |                 |
| cycloheximide                                               | Sigma              | Cat.#66-81-9         |                 |
| DL-Dithiothreitol                                           | Medchemexpress     | Cat.#HY-15917        |                 |
| Digitonin                                                   | Sigma              | Cat.#11024-24-1      |                 |
| DMEM, high glucose                                          | Cytiva HyClone     | Cat.#SH30022.02      |                 |
| Fetal bovine serum                                          | Gibco              | Cat.#10437028        |                 |
| formaldehyde                                                | Sigma              | Cat.#50-00-0         |                 |
| formic acetic                                               | Sigma              | Cat.#64-18-6         |                 |
| Human VEGF-121, Animal-Free Recombinant Protein             | PeproTech          | Cat.#AF-100-20A      |                 |
| iodoacetamide                                               | Sigma              | Cat.#144-48-9        |                 |
| MitoTracker green                                           | Invitrogen         | Cat.#M7514           |                 |
| MitoTracker deep red                                        | Invitrogen         | Cat.#M22426          |                 |
| MitoTracker SOX                                             | Invitrogen         | Cat.#M36008          |                 |
| OptiMEM                                                     | Gibco              | Cat.#51985034        |                 |
| Oligomycin from Streptomyces diastatochromogenes            | Sigma              | Cat.#1404-19-9       |                 |
| Penicillin-Streptomycin                                     | Gibco              | Cat.#11058021        |                 |
| poly-D-lysine                                               | Advanced BioMatrix | Cat.#5049            |                 |
| Poly(Vinyl alcohol)                                         | Sigma              | Cat.#341584          |                 |
| Potassium hydroxide                                         | Honeywell Fluka    | Cat.#1310-58-3       |                 |
| ReLeSR                                                      | STEMCELL           | Cat.#05872           |                 |
| Rotenone                                                    | Sigma              | Cat.#83-79-4         |                 |
| TransIT <sup>®</sup> -293 Transfection Reagent              | Mirus              | Cat.#MIR 2704        |                 |
| Tween 20                                                    | Sigma              | Cat.#9005-64-5       |                 |
| tetracycline                                                | Invitrogen         | Cat.#550205          |                 |
| trypsin (Sequencing Grade Modified )                        | Promega            | Cat.#V5111           |                 |
| urea                                                        | Sigma              | Cat.#57-13-6         |                 |
| Vitronectin XF                                              | STEMCELL           | Cat.#100-0763, 07180 |                 |
| Seahorse XF DMEM medium, pH 7.4                             | Agilent            | 103575-100           |                 |
| Seahorse XF RPMI medium, pH 7.4                             | Agilent            | 103576-100           |                 |
| Y-27632                                                     | Biovision          | Cat.#1596-5          |                 |
| Z-Leu-Leu-Leu-al (MG132)                                    | Sigma              | Cat.#133407-82-6     |                 |
| zeocin                                                      | Invitrogen         | Cat.#R25001          |                 |
| Cell-Tak                                                    |                    |                      |                 |
| <i>Plasmids</i>                                             |                    |                      |                 |
| <b>SOURCE</b>                                               | <b>IDENTIFIER</b>  |                      |                 |
| pcDNA <sup>™</sup> 5/FRT/TO                                 | Invitrogen         | Cat.#V652020         |                 |
| pOG44 Flp-Recombinase Expression Vector                     | Invitrogen         | Cat.#V600520         |                 |
| eSpCas9(1.1)-T2A-Puro                                       | Addgene            | 101039               |                 |
| <i>Other</i>                                                |                    |                      |                 |
| <b>SOURCE</b>                                               | <b>IDENTIFIER</b>  |                      |                 |
| C-18 Tips, 100 µL bed                                       | Pierce             | Cat.#87784           |                 |
| NuPAGE Bis Tris gels (10%)                                  | Invitrogen         | Cat.#NP0301BOX       |                 |
| 0.2 µm PVDF blotting membrane                               | Amersham Hybond    | Cat.#10600021        |                 |
