# Supplementary material for: Homozygous variant in translocase of outer mitochondrial membrane 7 leads to metabolic reprogramming and microcephalic osteodysplastic dwarfism with moyamoya disease
Source: PubMed Central journal article supplement — eBioMedicine. 2024 Nov 29;110:105476. doi: 10.1016/j.ebiom.2024.105476 (PMC11648121; doi:10.1016/j.ebiom.2024.105476), 2024-11-29
Supplement: mmc2.pdf [file mmc2.pdf]

Table S2. Sequences of oligo nucleotides

| NAME                              | SEQUENCES                                                                                                                                                                                             | DESCRIPTION                                                            |
|-----------------------------------|-------------------------------------------------------------------------------------------------------------------------------------------------------------------------------------------------------|------------------------------------------------------------------------|
| <i>gRNA</i>                       |                                                                                                                                                                                                       |                                                                        |
| TOMM7_gRNA3_iPSC                  | 5' - GGAGCCAGTTTGCCATTCGC -3'                                                                                                                                                                         | gRNA sequencing used for gene editing in iPSCs                         |
| tomm7_gRNA3_fish                  | 5' - ATCCCCACTGTGCTCTATCT -3'                                                                                                                                                                         | gRNA sequencing used for gene editing in zebrafish                     |
| <i>ssODN</i>                      |                                                                                                                                                                                                       |                                                                        |
| TOM7_iPS PS-anti asymmetric ssODN | 5' -<br>GCTGTCTCCGCCACCCTCTTCCCTCCAGTCACTTTCCCGGTTCTTC<br>TCCCACCTGACCCAGGTAAATCACAGAAGGATAAAGCCCCAACGGA<br>TGGCAAACCTGGCTCCCCTTGAAGAGCTGCTGAAGTCTCTGCTTGGC<br>CTCTTTGCTCAGCTTCACCATGGCGACGGCCGTG -3' | repair template for gene editing in iPSCs                              |
| <i>PCR</i>                        |                                                                                                                                                                                                       |                                                                        |
| TOMM7_exon1_F                     | 5' - CTTTCGGATTCCCGACG -3'                                                                                                                                                                            | confirmation of TOM7 c.86C>T in patient's genomic DNA                  |
| TOMM7_exon1_R                     | 5' - AAAATGGGGCTGCTGTCTC -3'                                                                                                                                                                          |                                                                        |
| T7_cDNA_Flp-In genotyping_F       | 5' - ATGGTGAAGCTGAGCAAAGA -3'                                                                                                                                                                         | amplification of Flp-In sequences                                      |
| lacZ_Flp In_ genotyping_R         | 5' - CCTTCCTGTAGCCAGCTTTCATCAA -3'                                                                                                                                                                    |                                                                        |
| TOMM7_ontargetPCR_F               | 5' - GGAAGAGCAGGGAAGGTTAAAGGCG -3'                                                                                                                                                                    | amplification of CRISPR-targeted regions from genomic DNA in iPSCs     |
| TOMM7_ontargetPCR_R               | 5' - CATCCAACCCTCCCTACAATCCCGAG -3'                                                                                                                                                                   |                                                                        |
| tomm7_ontargetPCR_F               | 5' - GATGATCGTTTACTTCCGTCCACAG -3'                                                                                                                                                                    | amplification of CRISPR-targeted regions from genomic DNA in zebrafish |
| tomm7_ontargetPCR_R               | 5' - GTCATATCCGAGTTTCATAGACGC -3'                                                                                                                                                                     |                                                                        |
| <i>cloning</i>                    |                                                                                                                                                                                                       |                                                                        |
| HindIII_3xmyc TOM7_F              | 5' -<br>AAATTTAAGCTTGCCGCCATGGAGCAGAAACTCATCTCTGAAGAAG<br>ATCTGGAACAAAAGTTGATTTTCAGAAGAAGATCTGGAACAGAAGCT<br>CATCTCTGAGGAAGATCTGGTGAAGCTGAGC -3'                                                      | amplification of myc-tagged TOMM7 cDNA sequences                       |
| XhoI_STOP_TOM7_R                  | 5' - ATATATCTCGAGCTATTATTATCCCCAAAGTAGGC -3'                                                                                                                                                          | construction of gRNA sequences into eSpCas9(1.1)-T2A-Puro plasmid      |
| TOMM7 86C>T_Cas9 Cloning_F        | 5' - acaccGGAGCCAGTTTGCCATTCGC -3'                                                                                                                                                                    |                                                                        |
| TOMM7 86C>T_Cas9 Cloning_R        | 5' - aaaacGCGAATGGCAAACCTGGCTCC -3'                                                                                                                                                                   |                                                                        |
| <i>qPCR</i>                       |                                                                                                                                                                                                       |                                                                        |
| qPCR_EGLN1_F                      | 5' - GACCTGATACGCCACTGTAACG -3'                                                                                                                                                                       | quantification of EGLN1 expression in iEndo cells                      |
| qPCR_EGLN1_R                      | 5' - ACCTCCACTTACCTTGGCATC -3'                                                                                                                                                                        |                                                                        |
| qPCR_CHCHD2_F                     | 5' - CTGCAGTTGGCTCTTCTGCT -3'                                                                                                                                                                         | quantification of CHCHD2 expression in iEndo cells                     |
| qPCR_CHCHD2_R                     | 5' - TTCCCTGAGGCTCCTGGTAAG -3'                                                                                                                                                                        |                                                                        |
| qPCR_APLN_F                       | 5' - GATGGGAATGGGCTGGAAGAC -3'                                                                                                                                                                        | quantification of APLN expression in iEndo cells                       |
| qPCR_APLN_R                       | 5' - CCTCAGTCCTGCCTCAGAAAGG -3'                                                                                                                                                                       |                                                                        |
| qPCR_HK2_F                        | 5' - CAAGTGCAGAAGGTTGACCAAGT -3'                                                                                                                                                                      | quantification of HK2 expression in iEndo cells                        |
| qPCR_HK2_R                        | 5' - CTCGGTGTCTGTCCCATCTG -3'                                                                                                                                                                         |                                                                        |
| qPCR_SLC16A3_F                    | 5' - ACAGCCTGGATCTCCTCCAT -3'                                                                                                                                                                         | quantification of SLC16A3 expression in iEndo cells                    |
| qPCR_SLC16A3_R                    | 5' - AAACCAACCCCGTGATGAC -3'                                                                                                                                                                          |                                                                        |
| qPCR_SLC2A1_F                     | 5' - ACTGTCGTGTCGCTGTTTGT -3'                                                                                                                                                                         | quantification of SLC2A1 expression in iEndo cells                     |
| qPCR_SLC2A1_R                     | 5' - AGGACCCACTTCAAAGAAGGC -3'                                                                                                                                                                        |                                                                        |
