# Supplementary material for: Homozygous variant in translocase of outer mitochondrial membrane 7 leads to metabolic reprogramming and microcephalic osteodysplastic dwarfism with moyamoya disease
Source: PubMed Central journal article supplement — eBioMedicine. 2024 Nov 29;110:105476. doi: 10.1016/j.ebiom.2024.105476 (PMC11648121; doi:10.1016/j.ebiom.2024.105476), 2024-11-29
Supplement: mmc3.pdf [file mmc3.pdf]

**Table S3 Biochemical measurements**

| Patient                                  |                      | 1-III | 1-V  | 2-III | 3-III  | 4-III | 4-IV  | 5-III | 6-III | 7-III |  |
|------------------------------------------|----------------------|-------|------|-------|--------|-------|-------|-------|-------|-------|--|
| <b>Complete blood count</b>              |                      |       |      |       |        |       |       |       |       |       |  |
|                                          | units                |       |      |       |        |       |       |       |       |       |  |
| WBC                                      | x10 <sup>3</sup> /μL | 6.5   | 7.2  | 5.4   | 11.7   | 8.31  | 5.75  | 9.31  | 7.08  | NA    |  |
| Basophils                                | %                    | 1     | NA   | NA    | NA     | 0.1   | 0.3   | 0.4   | 0.3   | NA    |  |
| Eosinophils                              | %                    | 0     | NA   | NA    | NA     | 1.9   | 0.9   | 7.7   | 2.3   | NA    |  |
| Monocytes                                | %                    | 4     | NA   | NA    | NA     | 3.7   | 4.7   | 4.4   | 3.4   | NA    |  |
| Neutrophils                              | %                    | 65    | NA   | NA    | NA     | 67.8  | 55.1  | 53.5  | 58.7  | NA    |  |
| Lymphocytes                              | %                    | 28    | NA   | NA    | NA     | 26.5  | 39    | 34    | 35.3  | NA    |  |
| Platelets                                | x10 <sup>3</sup> /μL | 314   | 338  | 312   | 260    | 324   | 408   | 390   | 255   | NA    |  |
| RBC                                      | x10 <sup>6</sup> /μL | 5.06  | 4.65 | 5.32  | 5.01   | 4.63  | 5.01  | 5.13  | 4.83  | NA    |  |
| Ferritin                                 | ng/ml                | NA    | NA   | 301.3 | NA     | NA    | NA    | NA    | NA    | NA    |  |
| Hematocrit                               | %                    | 42.5  | 35.3 | 47.2  | 44.3   | 41.2  | 41.3  | 41.8  | 41.4  | NA    |  |
| Hemoglobin                               | g/dL                 | 14.2  | 12.4 | 16.1  | 14.7   | 13.5  | 13.6  | 13.5  | 13.3  | NA    |  |
| Iron                                     | mg/dL                | NA    | NA   | 90    | NA     | NA    | NA    | 75    | NA    | NA    |  |
| MCH                                      | pg                   | 28.1  | 26.7 | 30.3  | 29.4   | 29.2  | 27.1  | 26.3  | 27.5  | NA    |  |
| MCHC                                     | g/dL                 | 33.4  | 35.1 | 34.1  | 33.3   | 32.8  | 32.9  | 32.3  | 32.1  | NA    |  |
| MCV                                      | fL                   | 84    | 76   | 88.8  | 88.3   | 89    | 82.4  | 81.5  | 85.7  | NA    |  |
| unsaturated iron-binding capacity (UIBC) | mg/dL                | NA    | NA   | 285   | NA     | NA    | NA    | 361   | NA    | NA    |  |
| <b>Biochemistry</b>                      |                      |       |      |       |        |       |       |       |       |       |  |
|                                          | units                |       |      |       |        |       |       |       |       |       |  |
| Aspartate aminotransferase (AST)         | U/L                  | 24    | NA   | 30    | 12     | 30    | 27    | 27    | 22    | 31    |  |
| Alanine aminotransferase (ALT)           | U/L                  | 13    | NA   | NA    | NA     | 8     | 16    | 16    | 22    | NA    |  |
| Alkaline phosphatase                     | U/L                  | 159   | 172  | NA    | 58     | 101   | 91    | 91    | 461   | NA    |  |
| Albumin                                  | g/dL                 | NA    | NA   | NA    | NA     | NA    | 4.6   | NA    | 4.9   | NA    |  |
| Blood urea nitrogen (BUN)                | mg/dL                | 6     | NA   | 10    | NA     | 11.3  | 6.2   | 18.2  | 11.2  | NA    |  |
| Creatinine                               | mg/dL                | 0.21  | NA   | 0.59  | 0.49   | 0.3   | 0.4   | 0.4   | 0.5   | 0.42  |  |
| Calcium                                  | mg/dL                | 10    | 10   | NA    | 10     | NA    | 10.1  | 9.9   | 9.7   | NA    |  |
| Phosphorus                               | mg/dL                | 4.4   | 4.8  | NA    | 4.1    | NA    | NA    | 5.4   | 5.6   | NA    |  |
| Creatine kinase                          | U/L                  | 89    | NA   | NA    | NA     | 97    | NA    | NA    | 68    | NA    |  |
| IGF-1                                    | ng/mL                | 175   | NA   | NA    | 589.58 | 469.1 | 123.9 | 146.5 | 257   | 164   |  |
| Thyroid-stimulating hormone (TSH)        | mU/mL                | 2.17  | NA   | 2.4   | 9.99   | NA    | 4.01  | NA    | 4.06  | NA    |  |
| Free T4                                  | ng/dL                | 1.25  | NA   | 1.14  | 1.14   | NA    | 1.12  | NA    | 1     | NA    |  |
| Total thyroxine                          | ng/dL                | 8.74  | NA   | NA    | 6.28   | NA    | NA    | NA    | NA    | 9.26  |  |
| Glucose (fasting)                        | mg/dL                | 98    | NA   | 94    | 86     | 93    | 70    | 107   | 118   | 90    |  |
| Total cholesterol                        | mg/dL                | 114   | NA   | 188   | 137    | NA    | 216   | NA    | NA    | 189   |  |
| HDL-cholesterol                          | mg/dL                | 52    | NA   | 66    | 51     | NA    | 66    | NA    | NA    | NA    |  |
| LDL-cholesterol                          | mg/dL                | 60    | NA   | 115   | 78     | NA    | 133   | NA    | NA    | 100   |  |
| Triglycerides                            | mg/dL                | 51    | NA   | 66    | 91     | NA    | 80    | NA    | NA    | 57    |  |
| LDH                                      | U/L                  | 391   | NA   | NA    | NA     | 462   | 244   | 264   | 724   | NA    |  |
| Lactic acid                              | mmol/L               | 2     | NA   | NA    | NA     | 1.3   | 3.98  | 2.17  | NA    | NA    |  |
