# Supplementary material for: Homozygous variant in translocase of outer mitochondrial membrane 7 leads to metabolic reprogramming and microcephalic osteodysplastic dwarfism with moyamoya disease
Source: PubMed Central journal article supplement — eBioMedicine. 2024 Nov 29;110:105476. doi: 10.1016/j.ebiom.2024.105476 (PMC11648121; doi:10.1016/j.ebiom.2024.105476), 2024-11-29
Supplement: mmc6.pdf [file mmc6.pdf]

Figure 2C.

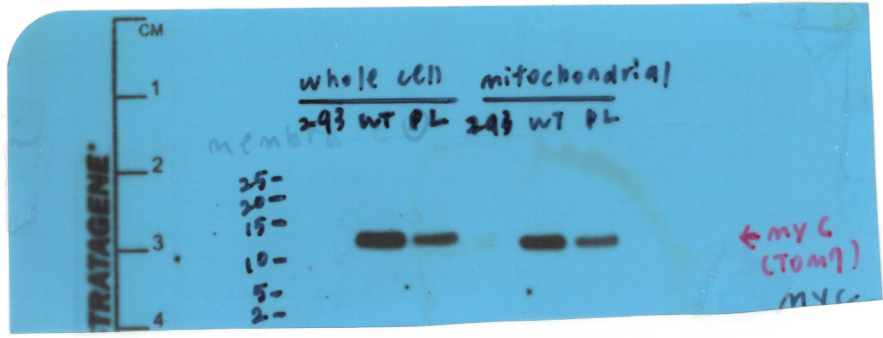

Ab: Anti-MYC (Thermo)

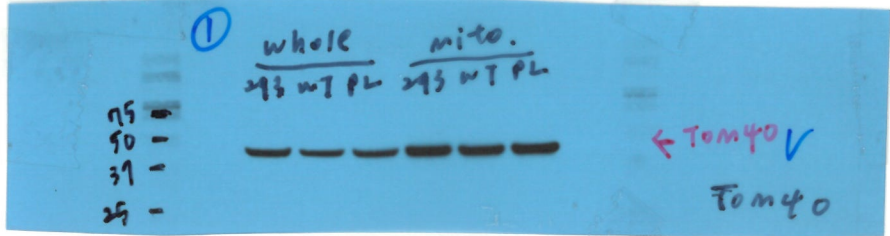

Ab: Anti-Tom40 (ProteinTech)

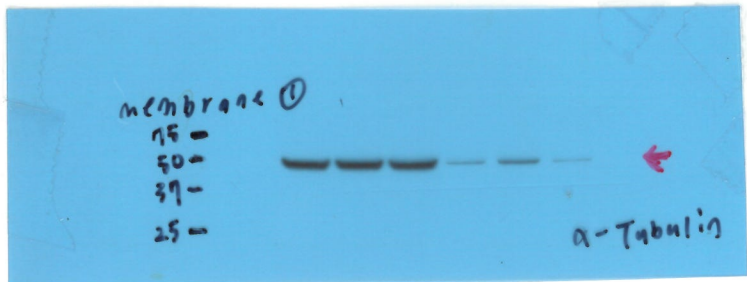

Ab: Anti-alpha-Tubulin (ProteinTech)

Figure 2F.

IP: myc  
post-IP    pre-IP    total lysate  
293 WT PL   293 WT PL   293 WT PL

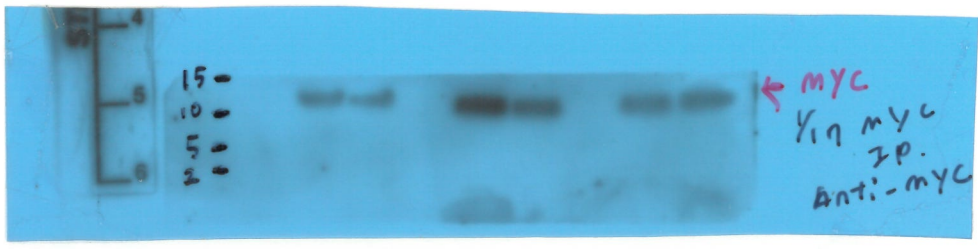

Ab: Anti-myc (Thermo)

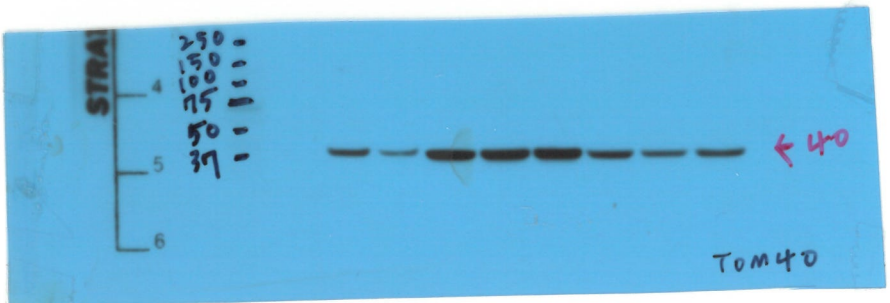

Ab: Anti-TOM40 (ProteinTech)

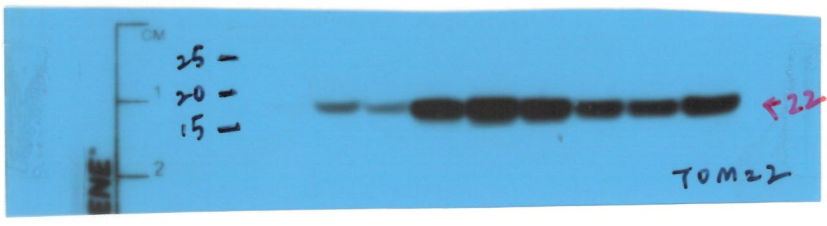

Ab: Anti-TOM22 (Thermo)

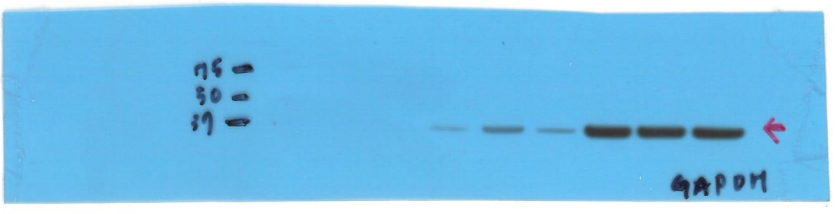

Ab: Anti-GAPDH (Santa Cruz)

Figure 3C.

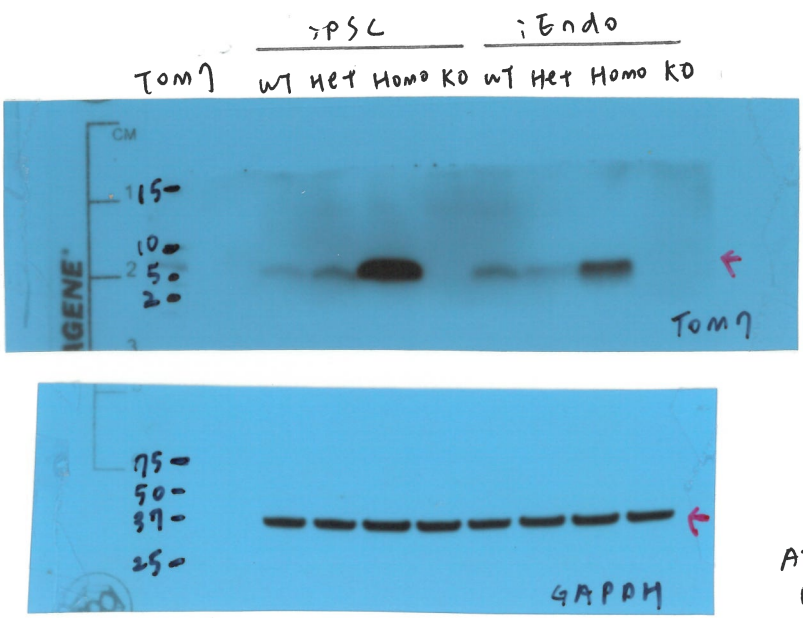

Anti-Tom7 (Thermo)  
 1° 1:500, 3 days, 0/W.  
 2° 1:5000.

Anti-GAPDH  
 1° 1:20,000  
 2° 1:40,000

Figure 3D.

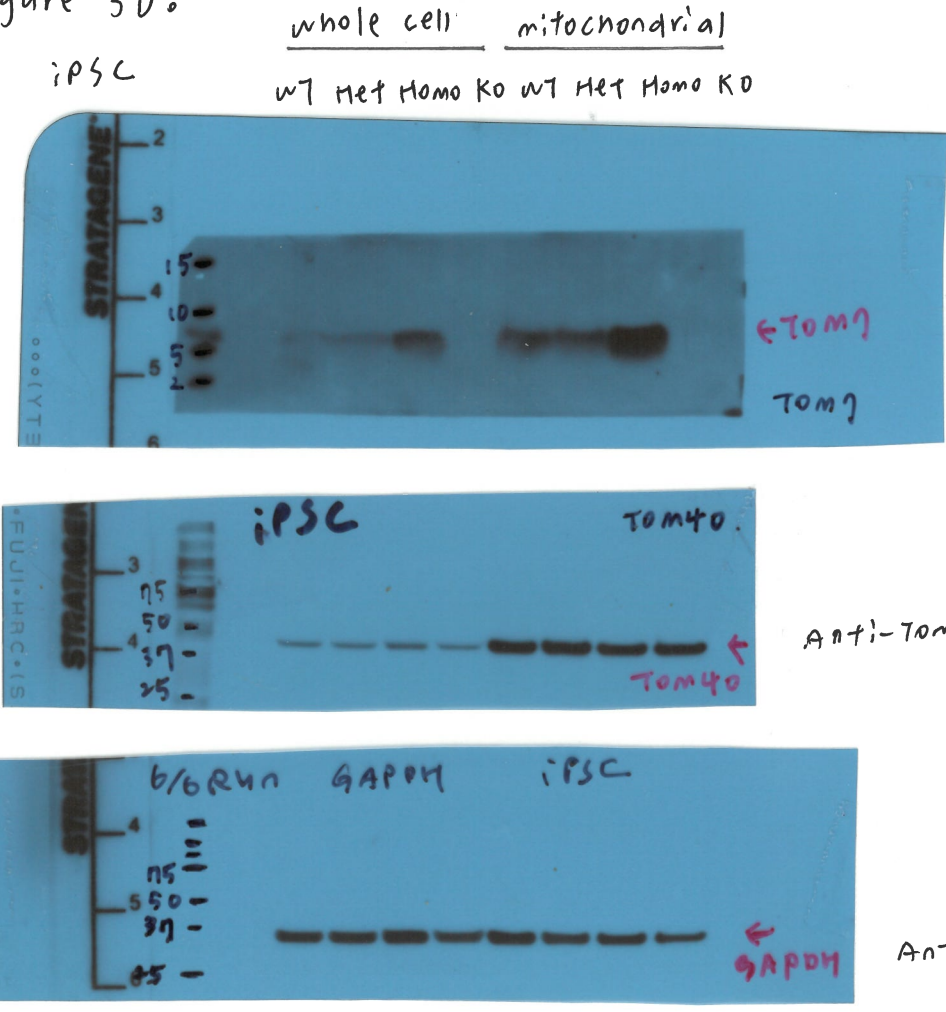

Anti-Tom7

Anti-Tom40.

Anti-GAPDH-HRP.

Protein Half Life of Tom7  
Figure 3E.

(Negative control: Tom7 Ab)

iEndo Tom7 WT cells      iEndo Tom7 KO cells

WT

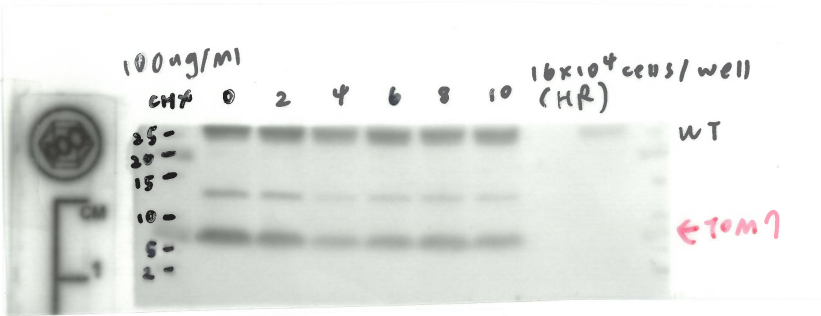

Anti-  
Ab: Tom7 (Thermo)

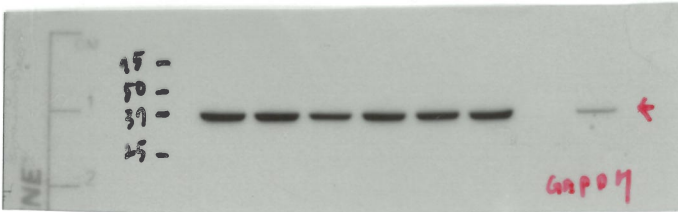

Anti-  
Ab: GAPDH-HRP (Santa Cruz)

HET

X iEndo Tom7 HET cells

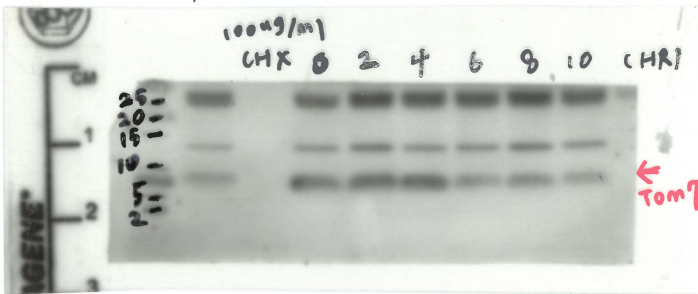

Anti-  
Ab: Tom7 (Thermo)

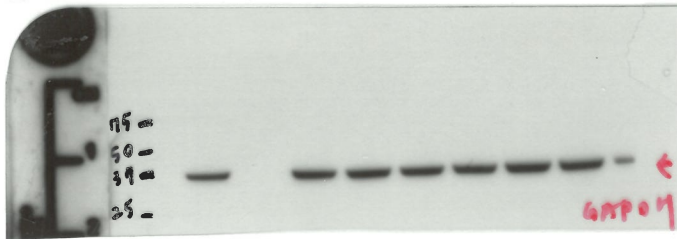

Anti-  
Ab: GAPDH-HRP (Santa Cruz)

(Negative control: Tom7 Ab)

iEndo Tom7 Homo cells      iEndo Tom7 KO cells

Homo

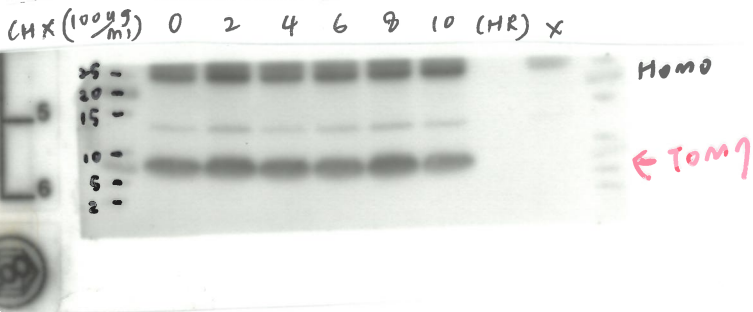

Anti-  
Ab: Tom7 (Thermo)

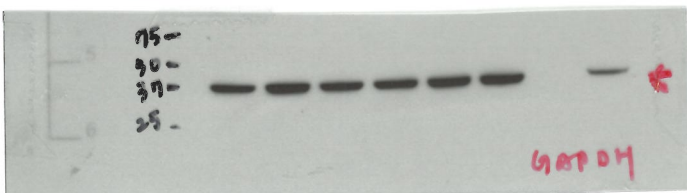

Anti-  
Ab: GAPDH-HRP (Santa Cruz)

Figure 3L. (only "iEndo" were shown)

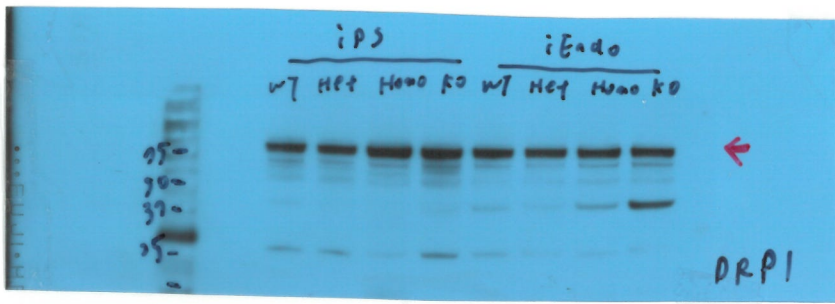

Anti-DRP1 (ProteinTech)  
1° 1:1000  
2° 1:10,000

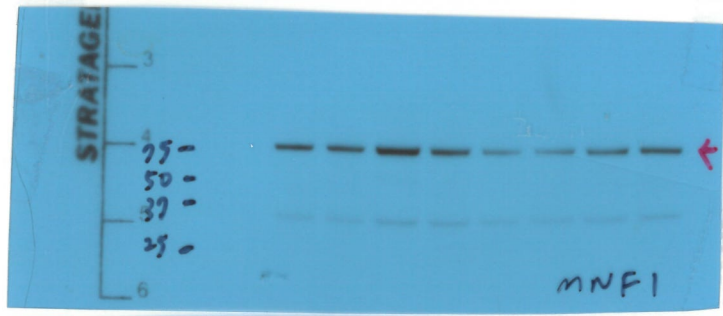

Anti-MNF1 (ProteinTech)  
1° 1:2000  
2° 1:8000

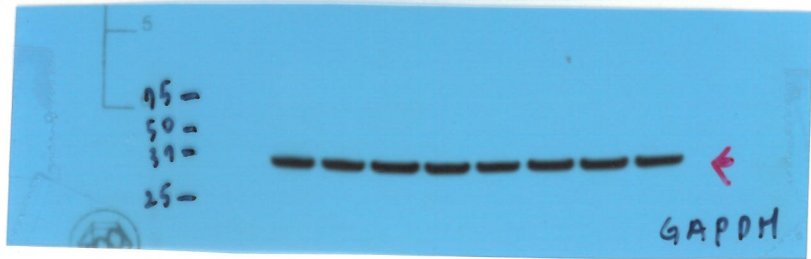

Figure 4C

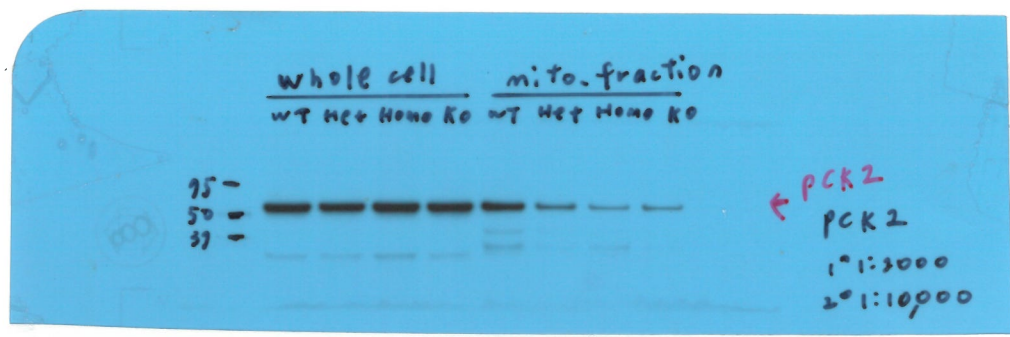

Anti-pck2  
(ProteinTech)

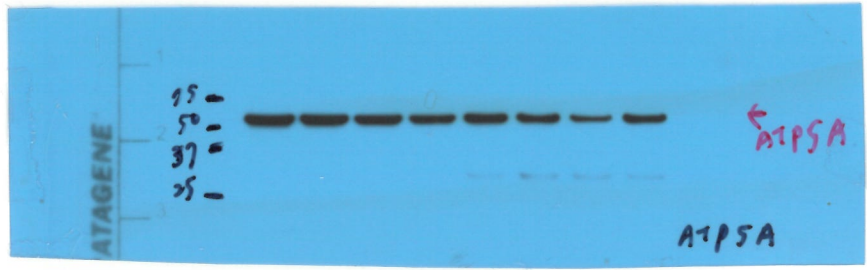

Anti-ATP5A [15H4C4]  
(Abcam)

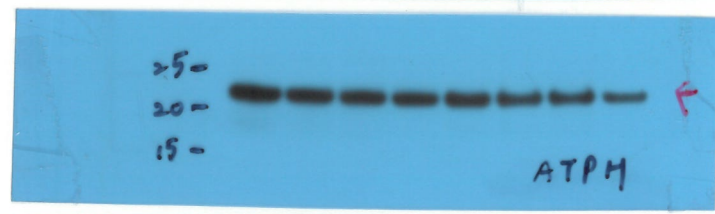

Anti-ATPH  
(ProteinTech)

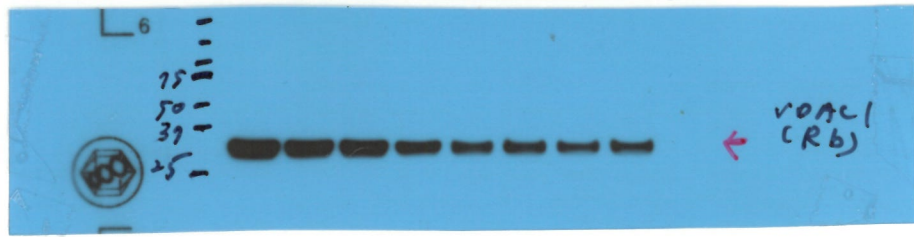

Anti-VDAC1  
(Abcam)

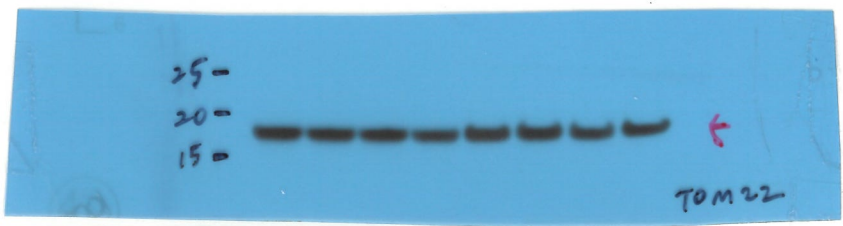

Anti-TOM22 (Thermo)

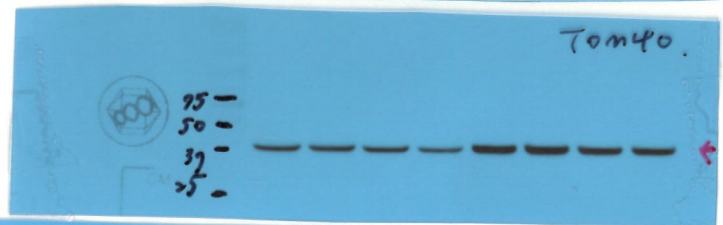

Anti-TOM40  
(ProteinTech)

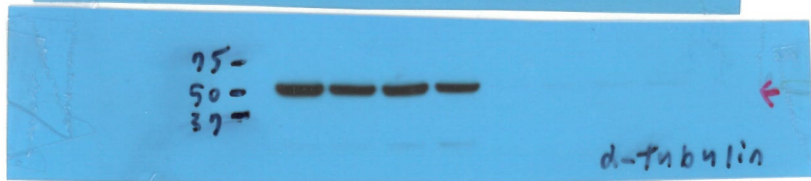

Anti-d-Tubulin  
(ProteinTech)

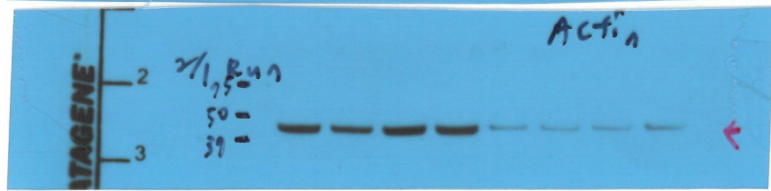

Anti-Actin-HRP  
(Santa Cruz)

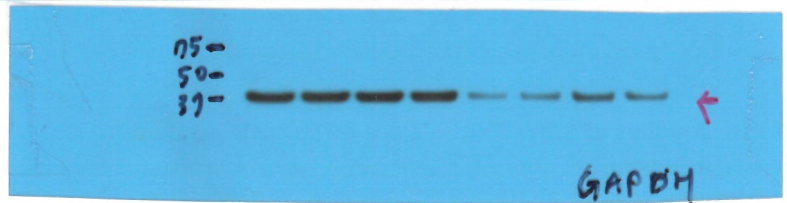

Anti-GAPDH-HRP  
(Santa Cruz)

Figure 5A.

zebrafish-brain  
WT 04/+ 07/+ 04/del

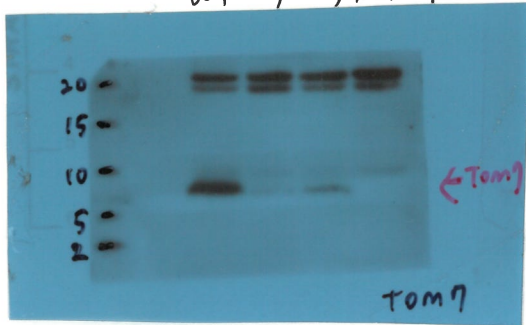

Anti-TOM7  
(Thermo)  
1° 1:500, 2 days o/w.  
2° 1:5,000.

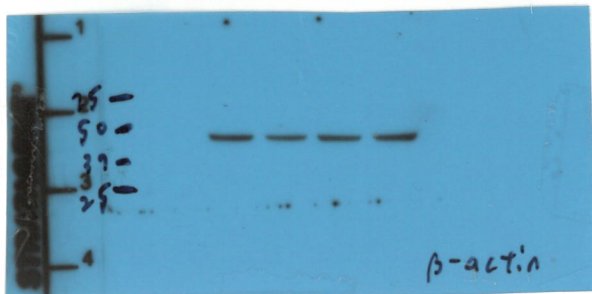

Anti-Actin-HRP.  
(Santa Cruz).

Figure 69.

iPSC  
WT Het Homo KO

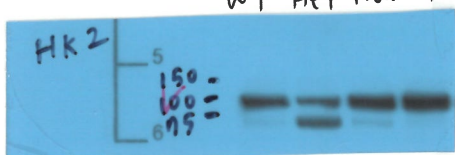

Anti-HK2 (ProteinTech)  
1° 1:15,000  
2° 1:50,000

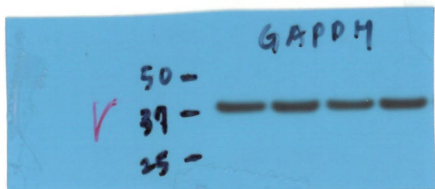

Anti-GAPDH-HRP.  
(Santa Cruz)

Figure 7c.

patient's iPSC

x x x x

Edited

WT Het patient

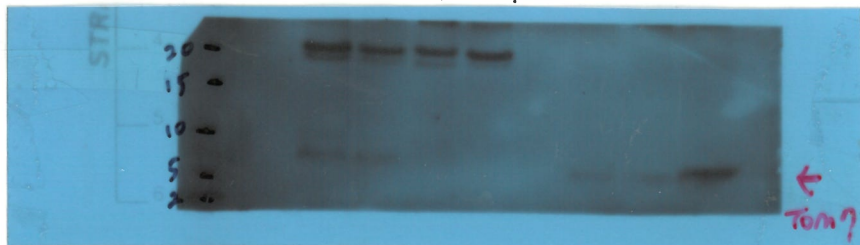

Anti-TOM7  
(Thermo)

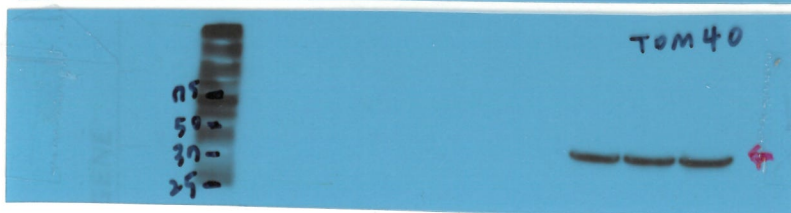

Anti-TOM40  
(ProteinTech)

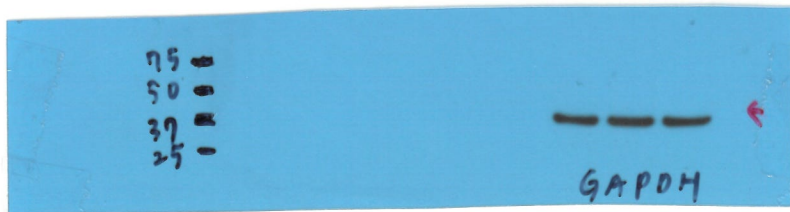

Anti-GAPDH-HRP  
(Santa Cruz)

Figure 7J.

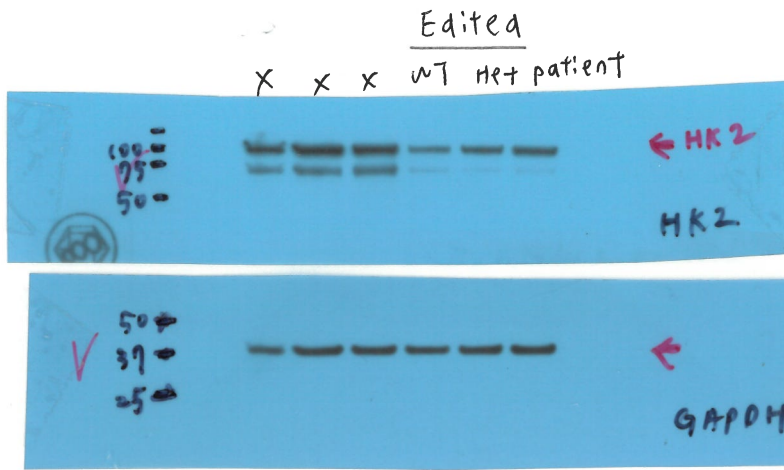

Anti-HK2 (ProteinTech)  
 1° 1:15,000  
 2° 1:50,000

Anti-GAPDH-HRP  
 (Santa Cruz)  
 1° 1:15,000

Figure S5E.

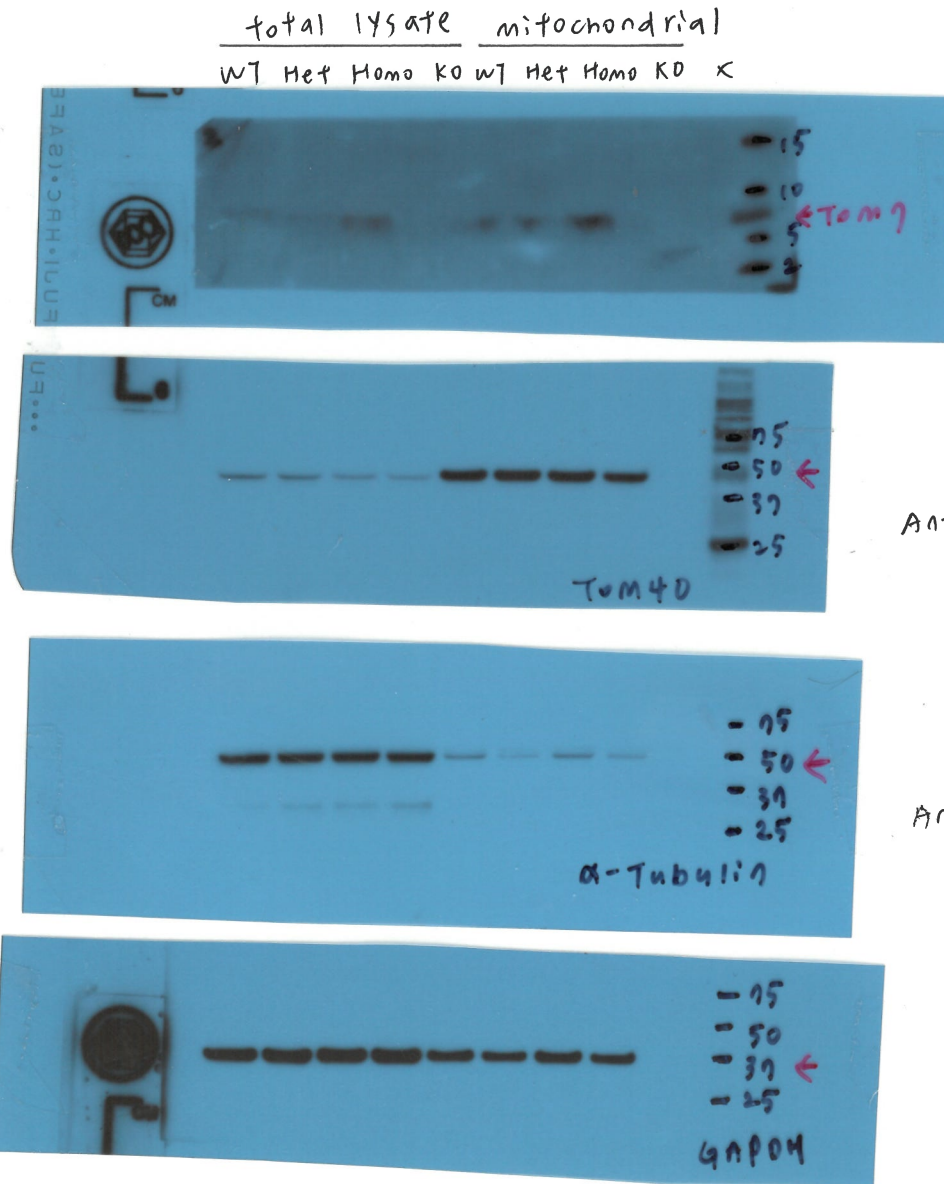

Anti-Tom7 (Thermo)  
 1° 1:500, 2 days O/N  
 2° 1:5000

Anti-Tom40 (ProteinTech)

Anti- $\alpha$ -Tubulin (ProteinTech)

Anti-GAPDH-HRP (Santa Cruz)



Figure 5B A

|       | WT |   |   |   | Het |   |   |   | Homo |   |   |   |
|-------|----|---|---|---|-----|---|---|---|------|---|---|---|
| CCCp  | -  | + | - | + | -   | + | - | + | -    | + | - | + |
| M9132 | -  | - | + | + | -   | - | + | + | -    | - | + | + |

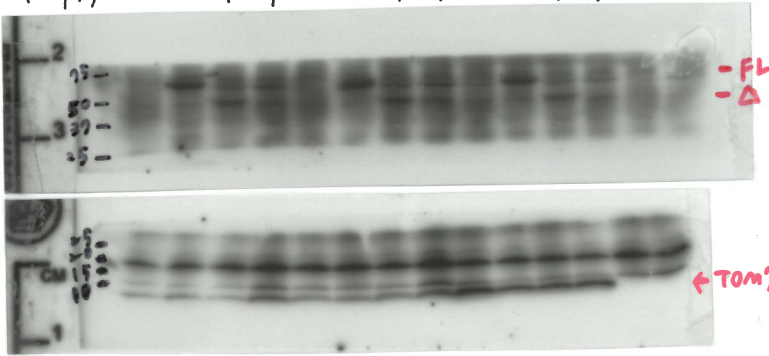

Input: 20x10<sup>6</sup> cells/lane.

Anti-PINK1  
(Cell Signaling, cat#6946)

1° 1:1000  
2° 1:10,000.

Anti-TOM7  
(Thermo)  
1° 1:500  
2° 1:5000.

|       | WT |   |   |   | Het |   |   |   | KO |   |   |   |
|-------|----|---|---|---|-----|---|---|---|----|---|---|---|
| CCCp  | -  | + | - | + | -   | + | - | + | -  | + | - | + |
| M9132 | -  | - | + | + | -   | - | + | + | -  | - | + | + |

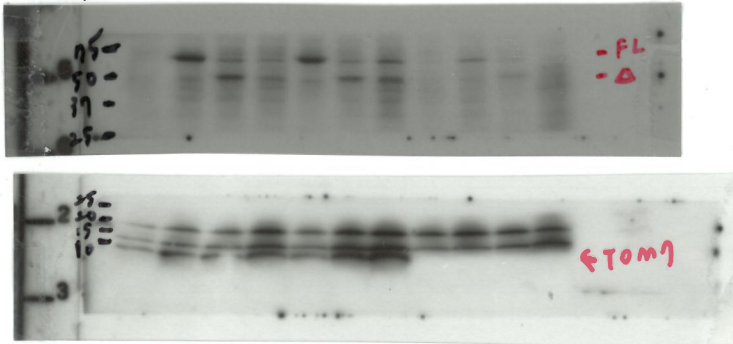

Anti-PINK1  
(Cell Signaling)

Anti-TOM7  
(Thermo)

Figure 5B C

| iPSC | whole cell |     |      |    | mitochondrial |     |      |    |
|------|------------|-----|------|----|---------------|-----|------|----|
|      | WT         | Het | Homo | KO | WT            | Het | Homo | KO |

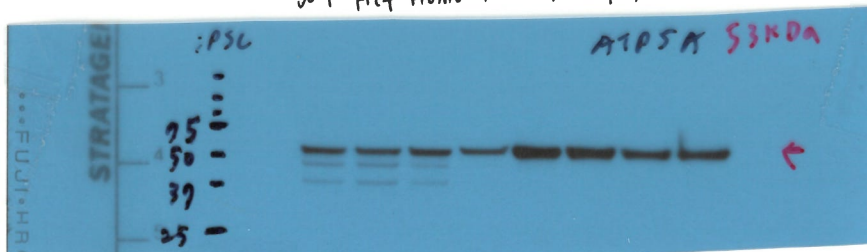

Anti-ATP5A (Abcam)  
1° 1:20,000  
2° 1:40,000.

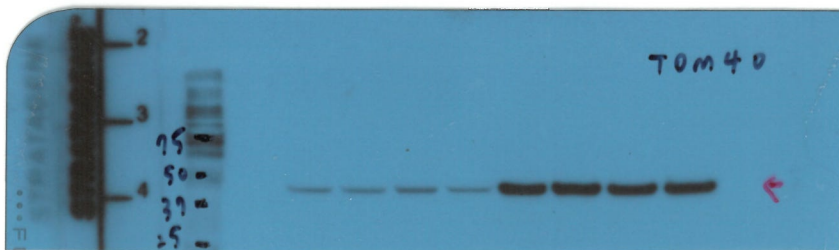

Anti-TOM40  
(ProteinTech)  
1° 1:20,000  
2° 1:40,000.

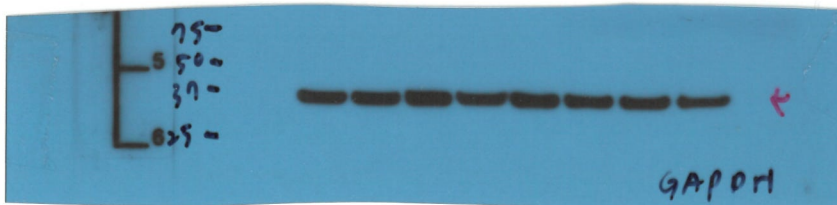

Anti-GAPDH-HRP  
(Santa Cruz)
