# Supplementary material for: Homozygous variant in translocase of outer mitochondrial membrane 7 leads to metabolic reprogramming and microcephalic osteodysplastic dwarfism with moyamoya disease
Source: PubMed Central journal article supplement — eBioMedicine. 2024 Nov 29;110:105476. doi: 10.1016/j.ebiom.2024.105476 (PMC11648121; doi:10.1016/j.ebiom.2024.105476), 2024-11-29
Supplement: mmc7.pdf [file mmc7.pdf]

a. Visual inspection of data normality in zebrafish experiments using histograms and Q-Q plots. WT (+/+), *tomm7<sup>+/+</sup>*; Het (+/ $\Delta$ ), *tomm7<sup>+/-</sup>*; KO ( $\Delta/\Delta$ ), *tomm7<sup>-/-</sup>*.

**Brain area (Figure 5C)**

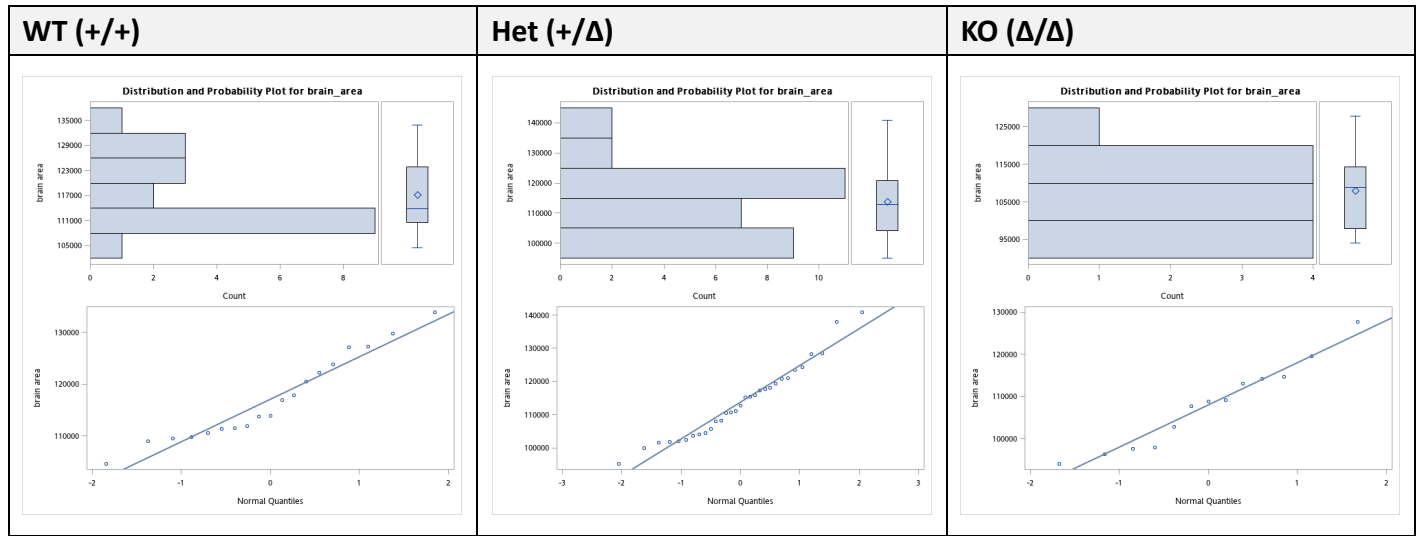

**Ceratohyal angles (Figure 5E)**

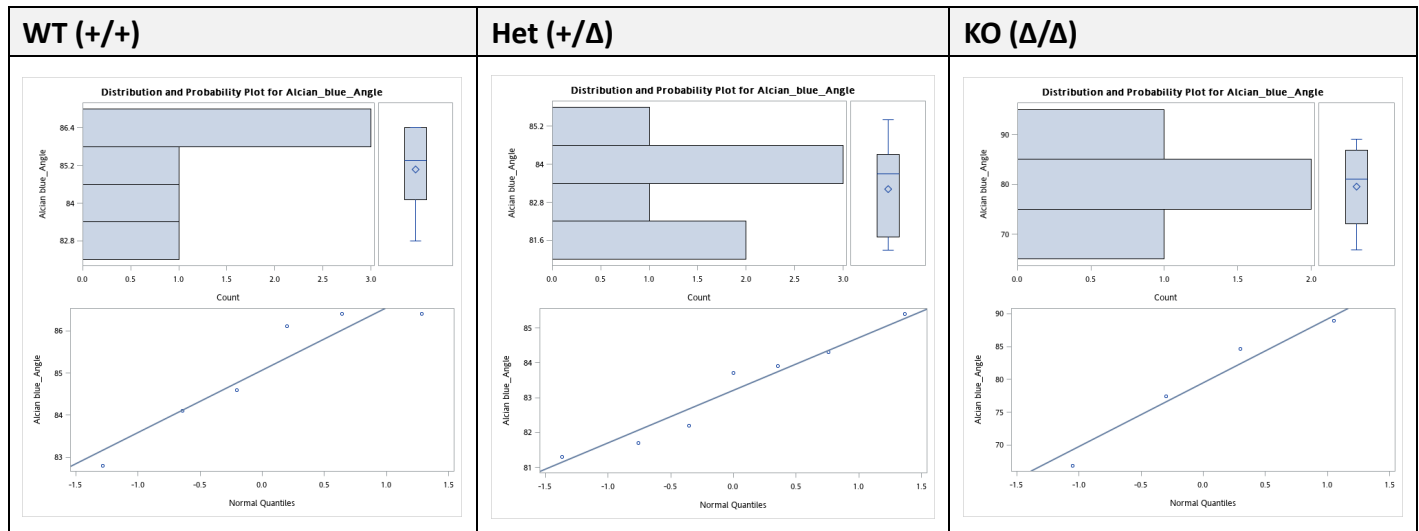

**Ceratohyal length (Figure 5E)**

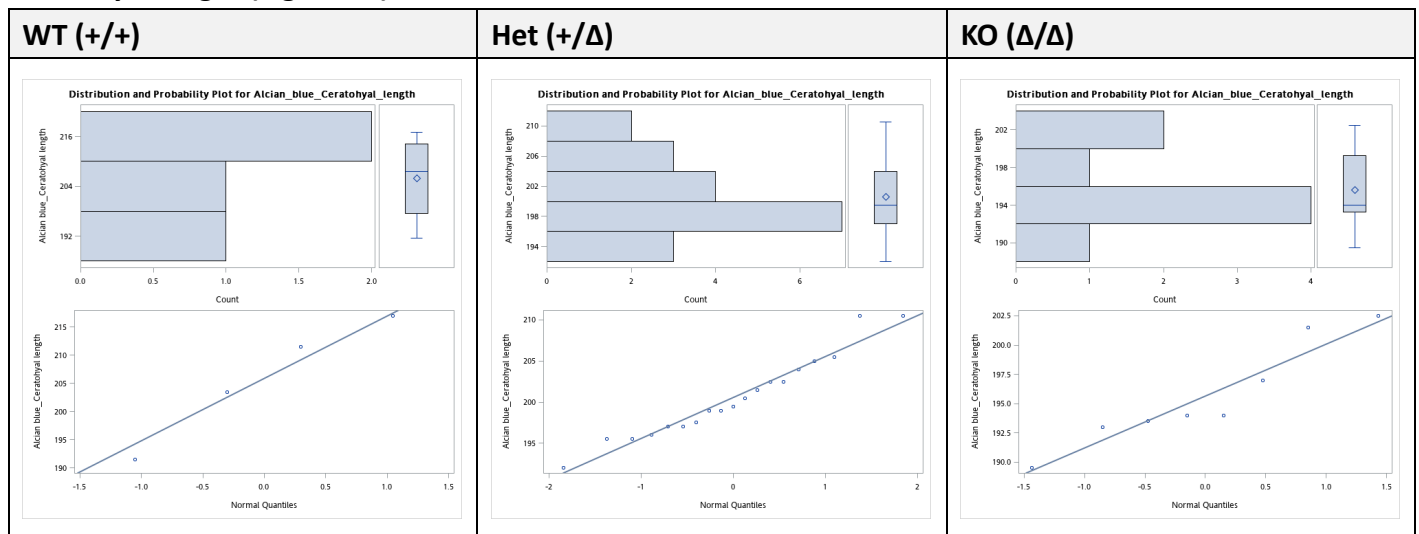

## Basal respiration (Figure 5H)

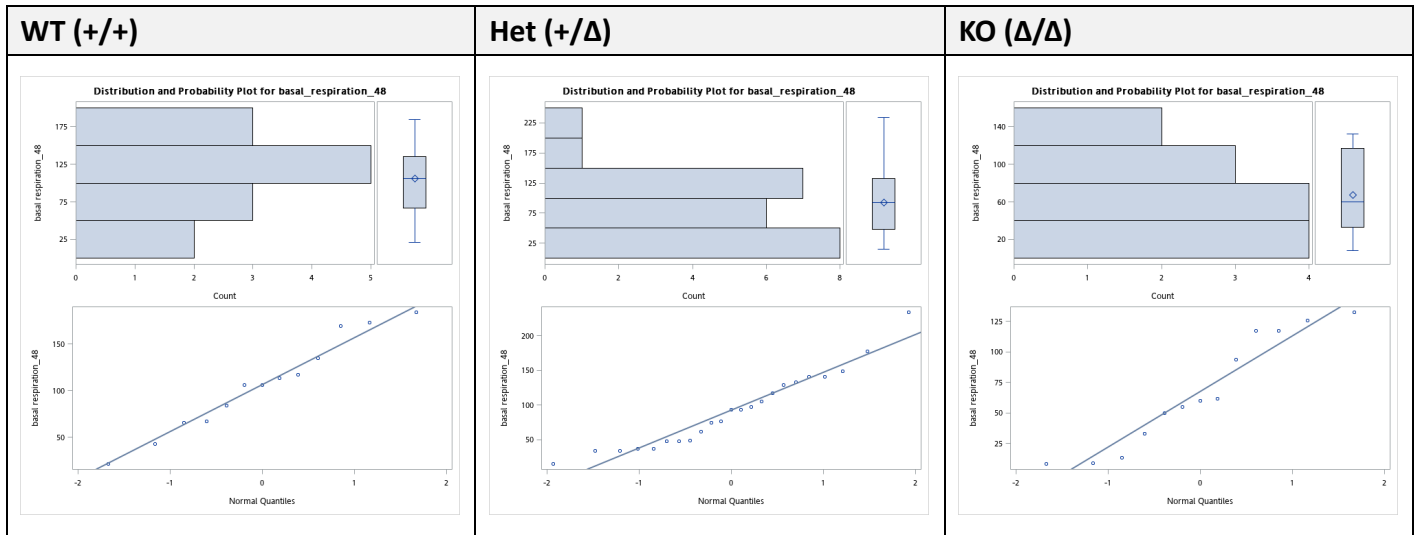

## ATP production (Figure 5H)

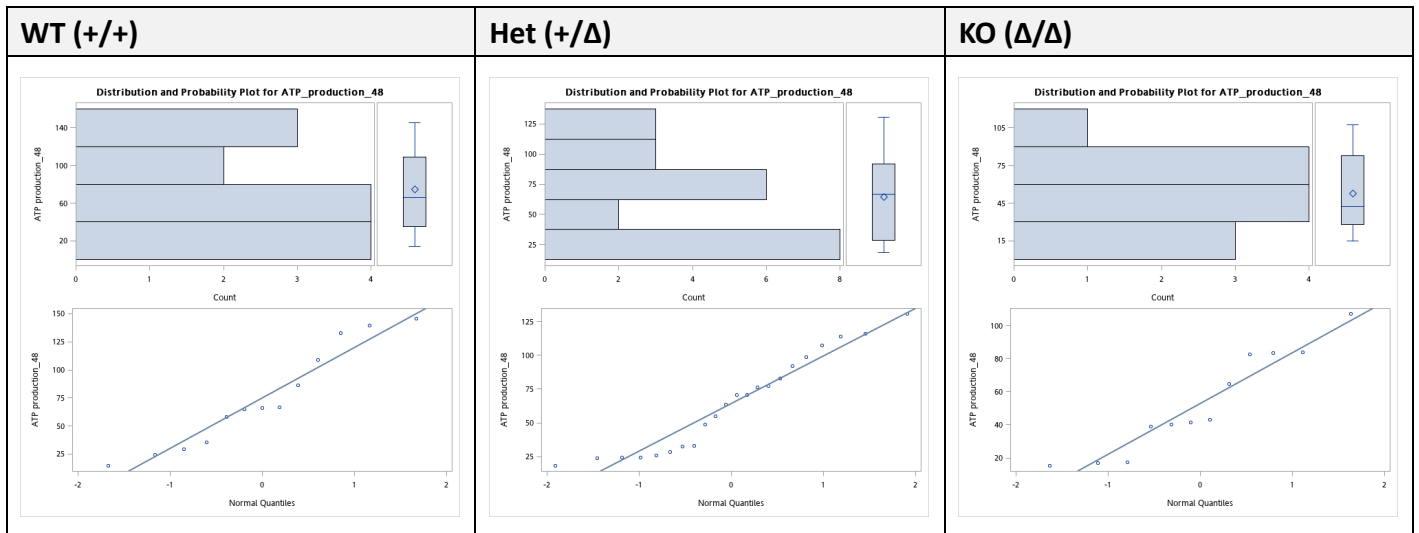

## Body length (Figure S7F)

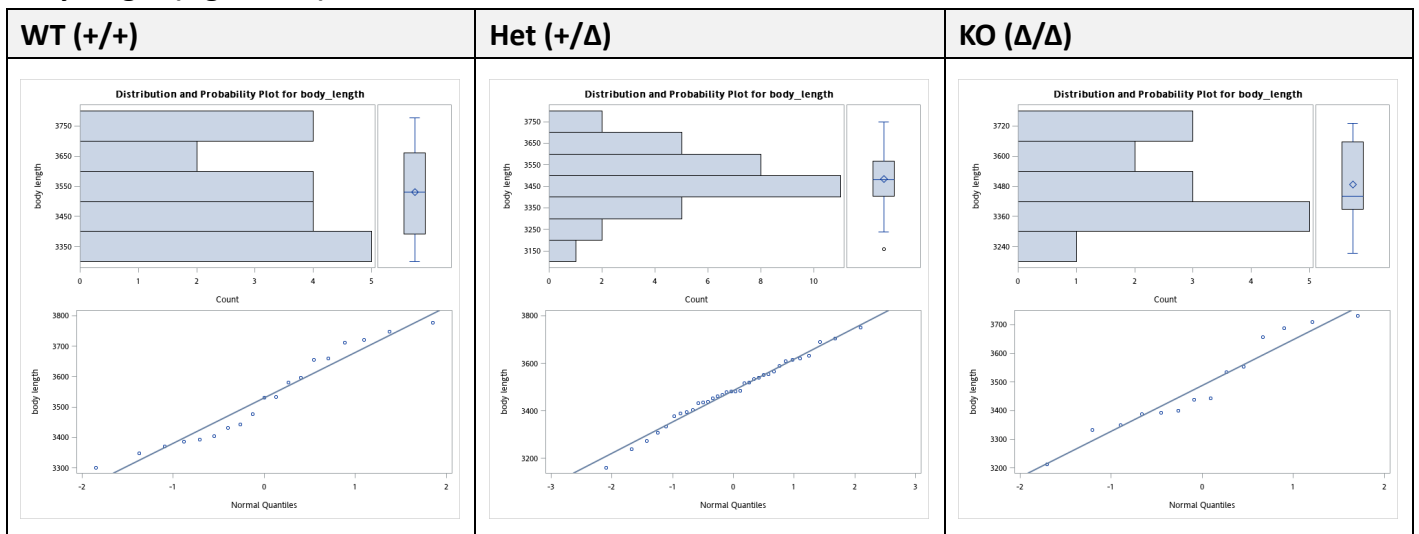

## ISV diameters (Figure S7H)

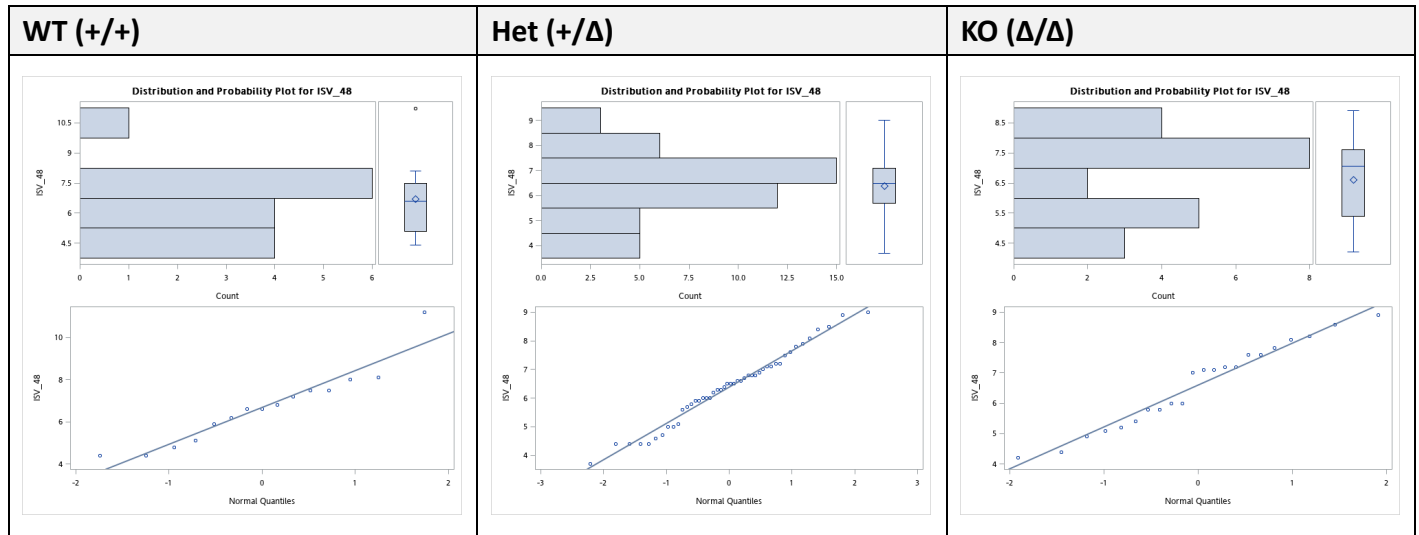

b. Study power of brain area and ceratohyal length in zebrafish. WT (+/+), *tomm7<sup>+/-</sup>*; Het (+/Δ), *tomm7<sup>+/-</sup>*; KO (Δ/Δ), *tomm7<sup>-/-</sup>*.

| Outcome                       | Sample size (+/+, +/Δ, Δ/Δ) | Mean (+/+, +/Δ, Δ/Δ)     | SD    | Alpha level | Power      |
|-------------------------------|-----------------------------|--------------------------|-------|-------------|------------|
| Brain area (Figure 5C)        | (19, 31, 13)                | (117166, 113730, 107996) | 10400 | 0.05        | <b>0.6</b> |
| Ceratohyal length (Figure 5E) | (4, 19, 8)                  | (206, 201, 196)          | 6.2   | 0.05        | <b>0.6</b> |
